# Supplementary material
Source: MDPI journal article supplement (https://www.mdpi.com/2073-4441/13/4/481)
Supplement: s1 [file s1]

| Phylum     | Class       | Order          | Family          | Genus                  | Species                                | U | R |
|------------|-------------|----------------|-----------------|------------------------|----------------------------------------|---|---|
| Annelida   | Clitellata  | Enchytraeida   | Enchytraeidae   | <i>Cernovitoviella</i> |                                        |   |   |
| Annelida   | Clitellata  | Enchytraeida   | Enchytraeidae   | <i>Enchytraeus</i>     |                                        |   |   |
| Annelida   | Clitellata  | Enchytraeida   | Enchytraeidae   | <i>Mesenchytraeus</i>  |                                        |   |   |
| Annelida   | Clitellata  | Lumbriculida   | Lumbriculidae   | <i>Kincaidiana</i>     | <i>Kincaidiana hexatheca</i>           |   |   |
| Annelida   | Clitellata  | Tubificida     | Naididae        | <i>Aulodrilus</i>      | <i>Aulodrilus pluriseta</i>            |   |   |
| Annelida   | Clitellata  | Tubificida     | Naididae        | <i>Chaetogaster</i>    | <i>Chaetogaster diaphanus</i>          |   |   |
| Annelida   | Clitellata  | Tubificida     | Naididae        | <i>Chaetogaster</i>    | <i>Chaetogaster diastrophus</i>        |   |   |
| Annelida   | Clitellata  | Tubificida     | Naididae        | <i>Chaetogaster</i>    | <i>Chaetogaster krasnopolskiae</i>     |   |   |
| Annelida   | Clitellata  | Tubificida     | Naididae        | <i>Limnodrilus</i>     | <i>Limnodrilus hoffmeisteri</i>        |   |   |
| Annelida   | Clitellata  | Tubificida     | Naididae        | <i>Nais</i>            | <i>Nais communis</i>                   |   |   |
| Annelida   | Clitellata  | Tubificida     | Naididae        | <i>Pristina</i>        | <i>Pristina aequiseta</i>              |   |   |
| Annelida   | Clitellata  | Tubificida     | Naididae        | <i>Pristina</i>        | <i>Pristina aequiseta</i>              |   |   |
| Annelida   | Clitellata  | Tubificida     | Naididae        | <i>Pristina</i>        | <i>Pristina jenkiniae</i>              |   |   |
| Annelida   | Clitellata  | Tubificida     | Naididae        | <i>Pristina</i>        | <i>Pristina leidyi</i>                 |   |   |
| Annelida   | Clitellata  | Tubificida     | Naididae        | <i>Pristina</i>        | <i>Pristina sima</i>                   |   |   |
| Annelida   | Oligochaeta | Lumbriculida   | Lumbriculidae   | <i>Rhynchelmis</i>     |                                        |   |   |
| Annelida   | Polychaeta  | Polychaeta     | Aeolosomatidae  | <i>Aeolosoma</i>       |                                        |   |   |
| Arthropoda | Acari       | Oribatida      | Oribatida       | <i>Oribatida</i>       |                                        |   |   |
| Arthropoda | Acari       | Trombidiformes | Torrenticolidae | <i>Torrenticola</i>    |                                        |   |   |
| Arthropoda | Crustacea   | Amphipoda      | Crangonyctidae  | <i>Crangonyx</i>       | <i>Crangonyx Gracilis Gr.</i>          |   |   |
| Arthropoda | Crustacea   | Amphipoda      | Crangonyctidae  | <i>Stygobromus</i>     |                                        |   |   |
| Arthropoda | Crustacea   | Cyclopoida     | Cyclopidae      | <i>Acanthocyclops</i>  | <i>Acanthocyclops robustus complex</i> |   |   |
| Arthropoda | Crustacea   | Cyclopoida     | Cyclopidae      | <i>Diacyclops</i>      | <i>Diacyclops nearcticus</i>           |   |   |
| Arthropoda | Crustacea   | Cyclopoida     | Cyclopidae      | <i>Eucyclops</i>       | <i>Eucyclops elegans</i>               |   |   |
| Arthropoda | Crustacea   | Cyclopoida     | Cyclopidae      | <i>Eucyclops</i>       | <i>Eucyclops pectinifer</i>            |   |   |
| Arthropoda | Crustacea   | Cyclopoida     | Cyclopidae      | <i>Macrocyclus</i>     | <i>Macrocyclus albidus</i>             |   |   |
| Arthropoda | Crustacea   | Cyclopoida     | Cyclopidae      | <i>Microcyclus</i>     | <i>Microcyclus rubellus</i>            |   |   |
| Arthropoda | Crustacea   | Cyclopoida     | Cyclopidae      | <i>Paracyclops</i>     | <i>Paracyclops chiltoni</i>            |   |   |
| Arthropoda | Crustacea   | Cyclopoida     | Cyclopidae      | <i>Paracyclops</i>     | <i>Paracyclops poppei</i>              |   |   |
| Arthropoda | Crustacea   | Diplostraca    | Bosminidae      | <i>Bosmina</i>         | <i>Bosmina longirostris</i>            |   |   |
| Arthropoda | Crustacea   | Harpacticoida  | Ameiridae       | <i>Nitocra</i>         |                                        |   |   |
| Arthropoda | Crustacea   | Harpacticoida  | Canthocamptidae | <i>Attheyella</i>      | <i>Attheyella illinoisensis</i>        |   |   |
| Arthropoda | Crustacea   | Harpacticoida  | Canthocamptidae | <i>Bryocamptus</i>     | <i>Bryocamptus zschokkei</i>           |   |   |
| Arthropoda | Crustacea   | Harpacticoida  | Canthocamptidae | <i>Canthocamptidae</i> | <i>Canthocamptidae</i>                 |   |   |
| Arthropoda | Crustacea   | Isopoda        | Asellidae       | <i>Caecidotea</i>      |                                        |   |   |
| Arthropoda | Crustacea   | Ostracoda      | Candonidae      | <i>Candonidae</i>      |                                        |   |   |
| Arthropoda | Crustacea   | Ostracoda      | Ostracoda       | <i>Ostracoda</i>       |                                        |   |   |
| Arthropoda | Insecta     | Coleoptera     | Elmidae         | <i>Narpus</i>          | <i>Narpus concolor</i>                 |   |   |
| Arthropoda | Insecta     | Diptera        | Chironomidae    | <i>Brillia</i>         | <i>Brillia flavifrons</i>              |   |   |
| Arthropoda | Insecta     | Diptera        | Chironomidae    | <i>Brundiniella</i>    | <i>Brundiniella eumorpha</i>           |   |   |
| Arthropoda | Insecta     | Diptera        | Chironomidae    | <i>Chironomus</i>      |                                        |   |   |
| Arthropoda | Insecta     | Diptera        | Chironomidae    | <i>Corynoneura</i>     | <i>Corynoneura lobata</i>              |   |   |
| Arthropoda | Insecta     | Diptera        | Chironomidae    | <i>Diplocladius</i>    | <i>Diplocladius cultriger</i>          |   |   |
| Arthropoda | Insecta     | Diptera        | Chironomidae    | <i>Eukiefferiella</i>  | <i>Eukiefferiella Brehmi Gr.</i>       |   |   |

| Phylum          | Class         | Order           | Family           | Genus                   | Species                               | U | R |
|-----------------|---------------|-----------------|------------------|-------------------------|---------------------------------------|---|---|
| Arthropoda      | Insecta       | Diptera         | Chironomidae     | <i>Eukiefferiella</i>   | <i>Eukiefferiella Claripennis</i> Gr. |   |   |
| Arthropoda      | Insecta       | Diptera         | Chironomidae     | <i>Limnophyes</i>       |                                       |   |   |
| Arthropoda      | Insecta       | Diptera         | Chironomidae     | <i>Micropsectra</i>     |                                       |   |   |
| Arthropoda      | Insecta       | Diptera         | Chironomidae     | <i>Orthoclaadiinae</i>  | RAI Taxon # 0011                      |   |   |
| Arthropoda      | Insecta       | Diptera         | Chironomidae     | <i>Pagastia</i>         |                                       |   |   |
| Arthropoda      | Insecta       | Diptera         | Chironomidae     | <i>Paracladopelma</i>   |                                       |   |   |
| Arthropoda      | Insecta       | Diptera         | Chironomidae     | <i>Parametriocnemus</i> |                                       |   |   |
| Arthropoda      | Insecta       | Diptera         | Chironomidae     | <i>Paratendipes</i>     |                                       |   |   |
| Arthropoda      | Insecta       | Diptera         | Chironomidae     | <i>Phaenopsectra</i>    |                                       |   |   |
| Arthropoda      | Insecta       | Diptera         | Chironomidae     | <i>Polypedilum</i>      | <i>Polypedilum aviceps</i>            |   |   |
| Arthropoda      | Insecta       | Diptera         | Chironomidae     | <i>Polypedilum</i>      | <i>Polypedilum Scalaenum</i> Gr.      |   |   |
| Arthropoda      | Insecta       | Diptera         | Chironomidae     | <i>Prodiamesa</i>       | <i>Prodiamesa olivacea</i>            |   |   |
| Arthropoda      | Insecta       | Diptera         | Chironomidae     | <i>Rheotanytarsus</i>   |                                       |   |   |
| Arthropoda      | Insecta       | Diptera         | Chironomidae     | <i>Tanytarsus</i>       |                                       |   |   |
| Arthropoda      | Insecta       | Diptera         | Chironomidae     | <i>Thienemannimyia</i>  | <i>Thienemannimyia</i> Gr.            |   |   |
| Arthropoda      | Insecta       | Diptera         | Chironomidae     | <i>Tvetenia</i>         | <i>Tvetenia Bavarica</i> Gr.          |   |   |
| Arthropoda      | Insecta       | Diptera         | Empididae        | <i>Neoplasta</i>        |                                       |   |   |
| Arthropoda      | Insecta       | Diptera         | Pelecorhynchidae | <i>Glutops</i>          |                                       |   |   |
| Arthropoda      | Insecta       | Diptera         | Simuliidae       | <i>Simuliidae</i>       |                                       |   |   |
| Arthropoda      | Insecta       | Diptera         | Stratiomyidae    | <i>Beris</i>            |                                       |   |   |
| Arthropoda      | Insecta       | Ephemeroptera   | Baetidae         | <i>Baetis</i>           | <i>Baetis Rhodani</i> Gr.             |   |   |
| Arthropoda      | Insecta       | Ephemeroptera   | Baetidae         | <i>Baetis</i>           | <i>Baetis tricaudatus complex</i>     |   |   |
| Arthropoda      | Insecta       | Ephemeroptera   | Heptageniidae    |                         | early instar                          |   |   |
| Arthropoda      | Insecta       | Plecoptera      | Plecoptera       | <i>Plecoptera</i>       | early instar                          |   |   |
| Arthropoda      | Insecta       | Trichoptera     | Glossosomatidae  | <i>Glossosoma</i>       |                                       |   |   |
| Arthropoda      | Insecta       | Trichoptera     | Hydropsychidae   | <i>Hydropsychidae</i>   |                                       |   |   |
| Arthropoda      | Insecta       | Trichoptera     | Lepidostomatidae | <i>Lepidostoma</i>      |                                       |   |   |
| Cnidaria        | Hydrozoa      | Hydrozoa        | Hydrozoa         | <i>Hydrozoa</i>         |                                       |   |   |
| Mollusca        | Bivalvia      | Veneroida       | Sphaeriidae      | <i>Pisidium</i>         |                                       |   |   |
| Mollusca        | Gastropoda    | Basommatophora  | Planorbidae      | <i>Menetus</i>          |                                       |   |   |
| Mollusca        | Gastropoda    | Littorinimorpha | Rissooidea       | <i>Rissooidea</i>       |                                       |   |   |
| Mollusca        | Gastropoda    | Neotaenioglossa | Hydrobiidae      | <i>Potamopyrgus</i>     | <i>Potamopyrgus antipodarum</i>       |   |   |
| Nemata          | Nemata        | Nemata          | Nemata           | <i>Nemata</i>           |                                       |   |   |
| Nemertea        | Enopla        | Hoplonemertea   | Tetrastemmatidae | <i>Prostoma</i>         |                                       |   |   |
| Nemertea        | Nemertea      | Nemertea        | Nemertea         | <i>Nemertea</i>         |                                       |   |   |
| Platyhelminthes | Trepaxonemata | Trepaxonemata   | Trepaxonemata    | <i>Trepaxonemata</i>    |                                       |   |   |
| Platyhelminthes | Turbellaria   | Tricladida      | Planariidae      | <i>Polycelis</i>        |                                       |   |   |
