# Supplementary material
Source: MDPI journal article supplement (https://www.mdpi.com/2073-4441/13/4/481)
Supplement: s1 [file s1]

| Variable                                           | Site | 2014          |               | 2015          |               | 2016          |               | 2017          |               | ANOVA results |       |              |    |
|----------------------------------------------------|------|---------------|---------------|---------------|---------------|---------------|---------------|---------------|---------------|---------------|-------|--------------|----|
|                                                    |      | U             | R             | U             | R             | U             | R             | U             | R             | Reach         | Year  | Reach (Year) |    |
| Hyporheic bacterial abundance (x 106 cells ml-1)   | KF   | 0.277 (0.330) | 0.728 (0.535) | 0.670 (0.284) | 1.129 (0.395) | 0.776 (0.080) | 0.705 (0.184) | 0.398 (0.167) | 0.340 (0.046) | 2014          | R > U | a            | ns |
|                                                    |      |               |               |               |               |               |               |               |               | 2015          |       | b            |    |
|                                                    | NF   | 0.623 (0.502) | 1.126 (0.260) | 1.571 (0.426) | 1.345 (0.152) | 1.993 (0.388) | 1.373 (0.269) | 0.537 (0.051) | 0.599 (0.068) | 2016          |       | ab           |    |
|                                                    |      |               |               |               |               |               |               |               |               | 2017          |       | a            |    |
|                                                    | SF   | 0.747 (0.098) | 0.402 (0.324) | 1.007 (0.118) | 0.715 (0.493) | 0.871 (0.207) | 0.919 (0.205) | 0.451 (0.077) | 0.444 (0.066) | 2014          | ns    | a            | ns |
|                                                    |      |               |               |               |               |               |               |               |               | 2015          |       | b            |    |
| 2016                                               | bc   |               |               |               |               |               |               |               |               |               |       |              |    |
| 2017                                               | c    |               |               |               |               |               |               |               |               |               |       |              |    |
| Ratio high NA : low NA bacteria                    | KF   | 0.41 (0.54)   | 0.33 (0.16)   | 0.84 (0.62)   | 1.48 (0.22)   | 0.84 (0.14)   | 1.44 (0.30)   | 1.26 (0.44)   | 1.54 (0.31)   | 2014          | R > U | a            | ns |
|                                                    |      |               |               |               |               |               |               |               |               | 2015          |       | b            |    |
|                                                    | NF   | 0.40 (0.12)   | 0.75 (0.45)   | 0.94 (0.43)   | 0.88 (0.14)   | 1.78 (0.34)   | 1.21 (0.49)   | 1.38 (0.42)   | 1.67 (0.55)   | 2016          |       | ab           |    |
|                                                    |      |               |               |               |               |               |               |               |               | 2017          |       | b            |    |
|                                                    | SF   | 1.24 (0.27)   | 0.54 (0.36)   | 1.17 (0.17)   | 0.94 (0.64)   | 1.17 (0.31)   | 1.00 (0.27)   | 1.29 (0.29)   | 1.30 (0.42)   | 2014          | U > R | a            | ns |
|                                                    |      |               |               |               |               |               |               |               |               | 2015          |       | a            |    |
| 2016                                               | b    |               |               |               |               |               |               |               |               |               |       |              |    |
| 2017                                               | b    |               |               |               |               |               |               |               |               |               |       |              |    |
| Hyporheic heterotrophic production (µg C L-1 hr-1) | KF   | 0.10 (0.07)   | 0.26 (0.10)   | 0.63 (0.49)   | 1.03 (0.47)   | 0.39 (0.34)   | 0.93 (0.48)   | 0.34 (0.20)   | 0.82 (0.21)   | 2014          | R > U | a            | ns |
|                                                    |      |               |               |               |               |               |               |               |               | 2015          |       | b            |    |
|                                                    | NF   | 0.08 (0.05)   | 0.12 (0.06)   | 0.15 (0.08)   | 0.82 (0.37)   | 0.50 (0.51)   | 0.95 (0.56)   | 0.48 (0.31)   | 0.71 (0.16)   | 2016          |       | b            |    |
|                                                    |      |               |               |               |               |               |               |               |               | 2017          |       | b            |    |
|                                                    | SF   | 0.06 (0.03)   | 0.22 (0.17)   | 0.50 ( 0.14)  | 0.99 (0.61)   | 0.40 (0.37)   | 0.24 (0.20)   | 0.60 (0.31)   | 0.62 (0.37)   | 2014          | ns    | a            | ns |
|                                                    |      |               |               |               |               |               |               |               |               | 2015          |       | b            |    |
| 2016                                               | a    |               |               |               |               |               |               |               |               |               |       |              |    |
| 2017                                               | b    |               |               |               |               |               |               |               |               |               |       |              |    |
