# Supplementary material
Source: MDPI journal article supplement (https://www.mdpi.com/2073-4441/13/4/481)
Supplement: s1 [file s1]

| Variable                            | Site | 2014         |               | 2015          |               | 2016         |                | 2017          |                | ANOVA results                |       |                                                   |
|-------------------------------------|------|--------------|---------------|---------------|---------------|--------------|----------------|---------------|----------------|------------------------------|-------|---------------------------------------------------|
|                                     |      | U            | R             | U             | R             | U            | R              | U             | R              | Reach                        | Year  | Reach (Year)                                      |
| Hyporheic hydraulic head (mm)       | KF   | 0.60 (5.55)  | 21.60 (10.21) | 3.00 (5.15)   | 22.40 (18.93) | -2.00 (4.53) | -44.80 (39.66) | 11.80 (10.23) | -55.20 (33.48) | 2014<br>2015<br>2016<br>2017 | U > R | b<br>b<br>a<br>a<br>ns                            |
|                                     | NF   | 2.80 (4.38)  | -2.80 (4.66)  | -0.20 (6.30)  | 4.40 (6.35)   | -8.40 (8.05) | -15.80 (38.92) | -1.20 (6.98)  | -6.00 (6.48)   | 2014<br>2015<br>2016<br>2017 | ns    | ns<br>ns<br>ns<br>ns                              |
|                                     | SF   | -0.80 (4.76) | 13.80 (23.83) | -1.00 (6.40)  | 46.40 (52.65) | 4.60 (28.75) | -33.20 (38.17) | -5.20 (7.95)  | -17.40 (27.43) | 2014<br>2015<br>2016<br>2017 | ns    | ab<br>b<br>a<br>ab<br>ns                          |
| Hyporheic temperature (°C)          | KF   | 8.46 (0.18)  | 7.68 (0.11)   | 12.8 0 (0.19) | 12.28 (0.08)  | 13.02 (0.04) | 13.28 (0.18)   | 12.46 (0.15)  | 12.40 (0.07)   | 2014<br>2015<br>2016<br>2017 | U > R | a<br>b<br>c<br>b<br>U > R<br>U > R<br>R > U<br>ns |
|                                     | NF   | 5.76 (0.32)  | 5.24 (0.39)   | 10.38 (0.26)  | 9.60 (0.07)   | 12.70 (0.00) | 12.66 (0.05)   | 10.98 (0.13)  | 10.86 (0.24)   | 2014<br>2015<br>2016<br>2017 | U > R | a<br>b<br>d<br>c<br>ns<br>U > R<br>ns<br>ns       |
|                                     | SF   | 7.05 (0.68)  | 6.22 (0.15)   | 12.82 (0.11)  | 13.06 (0.43)  | 12.74 (0.09) | 12.60 (0.20)   | 11.86 (0.09)  | 11.70 (0.14)   | 2014<br>2015<br>2016<br>2017 | ns    | a<br>d<br>c<br>b<br>ns                            |
| Hyporheic dissolved oxygen (mg L-1) | KF   | 5.89 (1.52)  | 7.45 (0.13)   | 6.94 (3.39)   | 7.78 (1.57)   | 9.76 (3.73)  | 12.00 (2.08)   | 6.98 (3.57)   | 8.68 (1.72)    | 2014<br>2015<br>2016<br>2017 | ns    | a<br>a<br>b<br>ab<br>ns                           |
|                                     | NF   | 9.27 (0.73)  | 9.98 (0.57)   | 7.98 (2.37)   | 10.20 (0.70)  | 9.94 (1.97)  | 10.26 (2.83)   | 9.34 (3.55)   | 6.60 (4.56)    | 2014<br>2015<br>2016<br>2017 | ns    | ns<br>ns<br>ns<br>ns                              |
|                                     | SF   | 7.89 (1.30)  | 8.13 (0.71)   | 7.18 (2.00)   | 7.70 (2.83)   | 9.98 (5.78)  | 7.08 (2.29)    | 6.76 (1.63)   | 6.04 (2.67)    | 2014<br>2015<br>2016<br>2017 | ns    | ns<br>ns<br>ns<br>ns                              |

| Variable                          | Site | 2014           |               | 2015           |                | 2016           |               | 2017           |                | ANOVA results |       |              |
|-----------------------------------|------|----------------|---------------|----------------|----------------|----------------|---------------|----------------|----------------|---------------|-------|--------------|
|                                   |      | U              | R             | U              | R              | U              | R             | U              | R              | Reach         | Year  | Reach (Year) |
| Hyporheic conductivity (μSi cm-1) | KF   | 278.00 (44.18) | 264.64 (0.33) | 230.74 (22.71) | 216.14 (12.38) | 218.56 (16.07) | 229.06 (9.45) | 260.32 (18.76) | 267.26 (8.27)  | 2014          | ns    | b            |
|                                   |      |                |               |                |                |                |               |                |                | 2015          |       | a            |
|                                   |      |                |               |                |                |                |               |                |                | 2016          |       | a            |
|                                   |      |                |               |                |                |                |               |                |                | 2017          |       | b            |
|                                   | NF   | 226.70 (8.88)  | 226.82 (0.65) | 217.88 (3.93)  | 218.68 (6.12)  | 190.44 (20.64) | 162.70 (9.52) | 211.20 (1.50)  | 209.30 (7.71)  | 2014          | U > R | c            |
|                                   |      |                |               |                |                |                |               |                |                | 2015          |       | bc           |
|                                   |      |                |               |                |                |                |               |                |                | 2016          |       | a            |
|                                   |      |                |               |                |                |                |               |                |                | 2017          |       | b            |
|                                   | SF   | 264.32 (15.77) | 259.42 (2.40) | 217.48 (7.88)  | 218.04 (8.93)  | 247.22 (59.64) | 211.02 (3.51) | 235.88 (37.43) | 253.16 (16.97) | 2014          | ns    | b            |
|                                   |      |                |               |                |                |                |               |                |                | 2015          |       | a            |
|                                   |      |                |               |                |                |                |               |                |                | 2016          |       | ab           |
|                                   |      |                |               |                |                |                |               |                |                | 2017          |       | ab           |
| Surface temperature (°C)          | KF   | 8.42 (0.13)    | 7.82 (0.15)   | 12.70 (0.07)   | 12.24 (0.05)   | 12.92 (0.04)   | 13.42 (0.08)  | 12.62 (0.04)   | 12.50 (0.00)   | 2014          | U > R | a            |
|                                   |      |                |               |                |                |                |               |                |                | 2015          |       | b            |
|                                   |      |                |               |                |                |                |               |                |                | 2016          |       | c            |
|                                   |      |                |               |                |                |                |               |                |                | 2017          |       | b            |
|                                   | NF   | 5.46 (0.27)    | 4.80 (0.16)   | 9.78 (0.13)    | 9.50 (0.00)    | 12.66 (0.05)   | 12.56 (0.05)  | 10.50 (0.07)   | 10.28 (0.08)   | 2014          | U > R | a            |
|                                   |      |                |               |                |                |                |               |                |                | 2015          |       | b            |
|                                   |      |                |               |                |                |                |               |                |                | 2016          |       | d            |
|                                   |      |                |               |                |                |                |               |                |                | 2017          |       | c            |
|                                   | SF   | 6.14 (0.05)    | 6.36 (0.11)   | 12.86 (0.05)   | 12.94 (0.05)   | 12.66 (0.05)   | 12.32 (0.08)  | 11.34 (0.05)   | 11.54 (0.05)   | 2014          | ns    | a            |
|                                   |      |                |               |                |                |                |               |                |                | 2015          |       | d            |
|                                   |      |                |               |                |                |                |               |                |                | 2016          |       | c            |
|                                   |      |                |               |                |                |                |               |                |                | 2017          |       | b            |
| Surface dissolved oxygen (mg L-1) | KF   | 8.84 (0.28)    | 8.85 (0.25)   | 10.66 (0.15)   | 10.42 (0.19)   | 18.94 (0.74)   | 19.04 (0.50)  | 10.28 (0.63)   | 10.32 (0.29)   | 2014          | ns    | a            |
|                                   |      |                |               |                |                |                |               |                |                | 2015          |       | b            |
|                                   |      |                |               |                |                |                |               |                |                | 2016          |       | c            |
|                                   |      |                |               |                |                |                |               |                |                | 2017          |       | b            |
|                                   | NF   | 11.66 (1.49)   | 11.61 (0.60)  | 12.18 (0.80)   | 12.22 (0.38)   | 18.54 (0.64)   | 19.58 (0.82)  | 10.46 (0.29)   | 10.12 (0.75)   | 2014          | ns    | b            |
|                                   |      |                |               |                |                |                |               |                |                | 2015          |       | b            |
|                                   |      |                |               |                |                |                |               |                |                | 2016          |       | c            |
|                                   |      |                |               |                |                |                |               |                |                | 2017          |       | a            |
|                                   | SF   | 10.05 (0.22)   | 10.09 (0.68)  | 10.70 (0.16)   | 10.62 (0.08)   | 19.24 (0.62)   | 19.78 (0.13)  | 9.94 (0.24)    | 9.82 (0.23)    | 2014          | ns    | a            |
|                                   |      |                |               |                |                |                |               |                |                | 2015          |       | b            |
|                                   |      |                |               |                |                |                |               |                |                | 2016          |       | c            |
|                                   |      |                |               |                |                |                |               |                |                | 2017          |       | ab           |

|                                 |      | 2014          |               | 2015          |               | 2016          |                | 2017          |               | ANOVA results |       |              |    |
|---------------------------------|------|---------------|---------------|---------------|---------------|---------------|----------------|---------------|---------------|---------------|-------|--------------|----|
| Variable                        | Site | U             | R             | U             | R             | U             | R              | U             | R             | Reach         | Year  | Reach (Year) |    |
| Surface conductivity (μSi cm-1) | KF   | 267.30 (1.76) | 265.12 (0.22) | 211.44 (8.88) | 213.78 (0.63) | 220.12 (1.10) | 225.08 (0.73)  | 276.34 (4.58) | 274.88 (0.37) | 2014          | ns    | c            | ns |
|                                 |      |               |               |               |               |               |                |               |               | 2015          |       | a            |    |
|                                 |      |               |               |               |               |               |                |               |               | 2016          |       | b            |    |
|                                 |      |               |               |               |               |               |                |               |               | 2017          |       | d            |    |
|                                 | NF   | 226.38 (2.07) | 226.06 (1.53) | 223.48 (0.43) | 222.16 (0.42) | 144.36 (2.45) | 139.32 (1.26)  | 212.88 (0.53) | 211.02 (3.08) | 2014          | U > R | d            | ns |
|                                 |      |               |               |               |               |               |                |               |               | 2015          |       | c            |    |
|                                 |      |               |               |               |               |               |                |               |               | 2016          |       | a            |    |
|                                 |      |               |               |               |               |               |                |               |               | 2017          |       | b            |    |
|                                 | SF   | 258.46 (1.07) | 258.60 (0.27) | 222.88 (1.23) | 222.66 (2.72) | 225.66 (0.55) | 217.48 (10.01) | 254.00 (1.49) | 253.58 (1.22) | 2014          | ns    | c            | ns |
|                                 |      |               |               |               |               |               |                |               |               | 2015          |       | a            |    |
|                                 |      |               |               |               |               |               |                |               |               | 2016          |       | a            |    |
|                                 |      |               |               |               |               |               |                |               |               | 2017          |       | b            |    |
