# Supplementary material
Source: MDPI journal article supplement (https://www.mdpi.com/2073-4441/13/4/481)
Supplement: s1 [file s1]

| Variable                             | Site | 2014          |               | 2015          |               | 2016          |               | 2017          |               | ANOVA results                |       |                         |
|--------------------------------------|------|---------------|---------------|---------------|---------------|---------------|---------------|---------------|---------------|------------------------------|-------|-------------------------|
|                                      |      | U             | R             | U             | R             | U             | R             | U             | R             | Reach                        | Year  | Reach (Year)            |
| Hyporheic nitrate ( $\mu\text{M}$ )  | KF   | 49.64 (30.82) | 77.63 (14.03) | 58.72 (8.80)  | 65.02 (0.97)  | 64.23 (7.51)  | 68.19 (2.45)  | 80.22 (3.96)  | 87.43 (2.60)  | 2014<br>2015<br>2016<br>2017 | R > U | a<br>a<br>a<br>b<br>ns  |
|                                      | NF   | 65.21 (4.72)  | 65.99 (1.38)  | 48.84 (15.20) | 54.47 (2.01)  | 38.18 (10.35) | 41.20 (6.03)  | 48.55 (15.29) | 41.54 (21.21) | 2014<br>2015<br>2016<br>2017 | ns    | b<br>ab<br>a<br>a<br>ns |
|                                      | SF   | 85.65 (21.68) | 89.05 (7.15)  | 56.30 (9.95)  | 53.25 (20.42) | 53.18 (23.01) | 52.91 (18.26) | 62.12 (21.37) | 59.16 (22.38) | 2014<br>2015<br>2016<br>2017 | ns    | b<br>a<br>a<br>a<br>ns  |
| Hyporheic nitrite ( $\mu\text{M}$ )  | KF   | 1.29 (0.91)   | 0.72 (0.16)   | 0.04 (0.02)   | 0.03 (0.00)   | 0.43 (0.06)   | 0.27 (0.14)   | 0.05 (0.00)   | 0.07 (0.04)   | 2014<br>2015<br>2016<br>2017 | ns    | d<br>a<br>c<br>b<br>ns  |
|                                      | NF   | 0.27 (0.03)   | 0.24 (0.05)   | 0.03 (0.01)   | 0.03 (0.00)   | 0.28 (0.09)   | 0.20 (0.10)   | 0.09 (0.02)   | 0.07 (0.01)   | 2014<br>2015<br>2016<br>2017 | U > R | c<br>a<br>c<br>b<br>ns  |
|                                      | SF   | 0.24 (0.06)   | 0.20 (0.01)   | 0.04 (0.00)   | 0.03 (0.00)   | 0.28 (0.17)   | 0.13 (0.06)   | 0.05 (0.03)   | 0.04 (0.01)   | 2014<br>2015<br>2016<br>2017 | U > R | b<br>a<br>b<br>a<br>ns  |
| Hyporheic ammonium ( $\mu\text{M}$ ) | KF   | 0.92 (1.19)   | 0.62 (0.08)   | 0.91 (0.43)   | 0.75 (0.23)   | 7.81 (4.97)   | 8.84 (1.65)   | 2.67 (0.99)   | 2.26 (1.06)   | 2014<br>2015<br>2016<br>2017 | ns    | a<br>a<br>c<br>b<br>ns  |
|                                      | NF   | 1.89 (0.20)   | 2.36 (1.38)   | 2.16 (2.47)   | 1.29 (0.91)   | 5.50 (4.87)   | 8.38 (1.17)   | 1.78 (0.21)   | 2.61 (1.42)   | 2014<br>2015<br>2016<br>2017 | ns    | a<br>a<br>b<br>a<br>ns  |
|                                      | SF   | 4.89 (7.24)   | 0.93 (0.37)   | 4.35 (6.82)   | 2.10 (1.18)   | 7.57 (14.19)  | 1.24 (1.31)   | 5.77 (9.53)   | 2.58 (1.07)   | 2014<br>2015<br>2016<br>2017 | ns    | ns<br>ns<br>ns<br>ns    |

|                               |      | 2014           |                 | 2015           |                | 2016           |                 | 2017           |                 | ANOVA results |       |              |    |
|-------------------------------|------|----------------|-----------------|----------------|----------------|----------------|-----------------|----------------|-----------------|---------------|-------|--------------|----|
| Variable                      | Site | U              | R               | U              | R              | U              | R               | U              | R               | Reach         | Year  | Reach (Year) |    |
| Hyporheic phosphate (μM)      | KF   | 2.42 (1.02)    | 1.98 (0.63)     | 1.42 (0.17)    | 1.30 (0.03)    | 1.02 (0.35)    | 1.30 (0.15)     | 1.59 (0.16)    | 1.60 (0.09)     | 2014          | ns    | b            | ns |
|                               |      |                |                 |                |                |                |                 |                |                 | 2015          |       | a            |    |
|                               |      |                |                 |                |                |                |                 |                |                 | 2016          |       | a            |    |
|                               | 2017 | b              |                 |                |                |                |                 |                |                 |               |       |              |    |
|                               | NF   | 0.98 (0.16)    | 0.73 (0.11)     | 1.20 (0.45)    | 1.16 (0.11)    | 1.27 (0.64)    | 1.13 (0.07)     | 1.12 (0.07)    | 1.20 (0.17)     | 2014          | ns    | a            | ns |
|                               |      |                |                 |                |                |                |                 |                |                 | 2015          |       | b            |    |
|                               |      |                |                 |                |                |                |                 |                |                 | 2016          |       | b            |    |
|                               | 2017 | b              |                 |                |                |                |                 |                |                 |               |       |              |    |
|                               | SF   | 1.61 (0.73)    | 1.01 (0.17)     | 1.46 (0.28)    | 1.38 (0.26)    | 1.48 (0.69)    | 1.33 (0.18)     | 1.57 (0.25)    | 1.38 (0.20)     | 2014          | ns    | ns           | ns |
| 2015                          |      |                |                 |                |                |                |                 |                |                 |               |       |              |    |
| 2016                          |      |                |                 |                |                |                |                 |                |                 |               |       |              |    |
| 2017                          |      |                |                 |                |                |                |                 |                |                 |               |       |              |    |
| Hyporheic silicate (μM)       | KF   | 639.65 (35.34) | 701.44 (8.19)   | 15.28 (2.38)   | 12.75 (2.00)   | 393.93 (11.74) | 319.54 (176.38) | 4.37 (0.99)    | 120.31 (259.42) | 2014          | ns    | c            | ns |
|                               |      |                |                 |                |                |                |                 |                |                 | 2015          |       | a            |    |
|                               |      |                |                 |                |                |                |                 |                |                 | 2016          |       | b            |    |
|                               | 2017 | a              |                 |                |                |                |                 |                |                 |               |       |              |    |
|                               | NF   | 589.69 (19.66) | 591.97 (9.63)   | 4.61 (0.26)    | 6.16 (2.08)    | 264.83 (35.49) | 202.13 (71.38)  | 3.08 (0.43)    | 3.14 (1.00)     | 2014          | ns    | c            | ns |
|                               |      |                |                 |                |                |                |                 |                |                 | 2015          |       | a            |    |
|                               |      |                |                 |                |                |                |                 |                |                 | 2016          |       | b            |    |
|                               | 2017 | a              |                 |                |                |                |                 |                |                 |               |       |              |    |
|                               | SF   | 685.04 (6.59)  | 682.27 (12.53)  | 13.43 (1.42)   | 16.95 (3.22)   | 419.64 (37.92) | 419.70 (13.68)  | 3.28 (0.17)    | 3.63 (0.53)     | 2014          | ns    | d            | ns |
| 2015                          |      |                |                 |                |                |                |                 |                |                 | b             |       |              |    |
| 2016                          |      |                |                 |                |                |                |                 |                |                 | c             |       |              |    |
| 2017                          | a    |                |                 |                |                |                |                 |                |                 |               |       |              |    |
| Hyporheic total nitrogen (μM) | KF   | 141.36 (66.68) | 150.87 (3.08)   | 117.95 (11.17) | 138.92 (18.09) | 184.49 (25.01) | 169.12 (24.21)  | 99.77 (5.52)   | 145.81 (27.13)  | 2014          | ns    | ab           | ns |
|                               |      |                |                 |                |                |                |                 |                |                 | 2015          |       | a            |    |
|                               |      |                |                 |                |                |                |                 |                |                 | 2016          |       | b            |    |
|                               | 2017 | a              |                 |                |                |                |                 |                |                 |               |       |              |    |
|                               | NF   | 124.54 (6.54)  | 203.92 (115.69) | 80.65 (15.94)  | 115.27 (28.65) | 139.22 (27.63) | 177.10 (37.39)  | 84.18 (29.12)  | 129.26 (60.73)  | 2014          | R > U | b            | ns |
|                               |      |                |                 |                |                |                |                 |                |                 | 2015          |       | a            |    |
|                               |      |                |                 |                |                |                |                 |                |                 | 2016          |       | ab           |    |
|                               | 2017 | ab             |                 |                |                |                |                 |                |                 |               |       |              |    |
|                               | SF   | 144.71 (18.80) | 183.02 (49.91)  | 131.54 (21.21) | 144.41 (25.66) | 125.01 (15.15) | 117.83 (31.64)  | 113.11 (51.22) | 118.85 (48.24)  | 2014          | ns    | b            | ns |
| 2015                          |      |                |                 |                |                |                |                 |                |                 | ab            |       |              |    |
| 2016                          |      |                |                 |                |                |                |                 |                |                 | a             |       |              |    |
| 2017                          | a    |                |                 |                |                |                |                 |                |                 |               |       |              |    |

|                                               |      | 2014            |                 | 2015          |               | 2016          |               | 2017          |               | ANOVA results                |       |                   |                         |
|-----------------------------------------------|------|-----------------|-----------------|---------------|---------------|---------------|---------------|---------------|---------------|------------------------------|-------|-------------------|-------------------------|
| Variable                                      | Site | U               | R               | U             | R             | U             | R             | U             | R             |                              | Reach | Year              | Reach (Year)            |
| Hyporheic total phosphorus (μM)               | KF   | 6.85 (2.78)     | 4.62 (1.37)     | 6.16 (2.69)   | 8.31 (4.00)   | 12.39 (4.70)  | 9.24 (3.38)   | 6.99 (1.98)   | 13.30 (3.52)  | 2014<br>2015<br>2016<br>2017 | ns    | b<br>ab<br>a<br>a | ns                      |
|                                               | NF   | 4.46 (0.84)     | 12.76 (14.51)   | 5.03 (2.02)   | 7.41 (2.03)   | 4.25 (0.82)   | 13.27 (8.55)  | 5.02 (1.75)   | 15.26 (9.89)  | 2014<br>2015<br>2016<br>2017 | R > U | ns                | ns                      |
|                                               | SF   | 10.88 (11.88)   | 11.63 (5.45)    | 7.95 (5.87)   | 18.81 (5.26)  | 7.73 (5.86)   | 4.36 (1.40)   | 11.62 (2.12)  | 14.46 (7.53)  | 2014<br>2015<br>2016<br>2017 | ns    | ns                | ns                      |
| Hyporheic dissolved organic carbon (mg L-1)   | KF   | 14.94 (9.05)    | 45.97 (18.00)   | 2.88 (0.32)   | 3.05 (0.30)   | 4.77 (1.45)   | 4.81 (0.17)   | 2.48 (0.44)   | 3.16 (0.38)   | 2014<br>2015<br>2016<br>2017 | R > U | c<br>a<br>b<br>a  | ns                      |
|                                               | NF   | 3.29 (0.10)     | 4.57 (0.55)     | 3.44 (0.10)   | 3.83 (0.28)   | 5.39 (0.68)   | 8.87 (6.50)   | 3.40 (0.66)   | 4.99 (3.66)   | 2014<br>2015<br>2016<br>2017 | R > U | a<br>a<br>b<br>a  | R > U<br>ns<br>ns<br>ns |
|                                               | SF   | 65.58 (66.04)   | 30.71 (22.27)   | 2.97 (0.31)   | 3.04 (0.39)   | 4.35 (1.09)   | 3.88 (0.41)   | 5.52 (3.25)   | 6.74 (7.98)   | 2014<br>2015<br>2016<br>2017 | ns    | b<br>a<br>a<br>a  | ns                      |
| Hyporheic particulate organic matter (mg L-1) | KF   | 147.60 (124.08) | 40.20 (18.05)   | 30.43 (28.19) | 47.60 (54.36) | 49.20 (36.13) | 53.20 (40.34) | 7.20 (7.56)   | 76.40 (33.81) | 2014<br>2015<br>2016<br>2017 | ns    | ns                | ns                      |
|                                               | NF   | 11.40 (4.62)    | 102.58 (120.20) | 27.20 (10.83) | 60.93 (25.08) | 18.40 (5.90)  | 51.60 (29.64) | 10.00 (15.10) | 82.40 (51.68) | 2014<br>2015<br>2016<br>2017 | R > U | ns                | ns                      |
|                                               | SF   | 26.07 (21.78)   | 95.14 (34.59)   | 29.20 (37.27) | 58.00 (39.09) | 19.20 (7.29)  | 59.20 (51.99) | 32.40 (35.08) | 53.60 (39.81) | 2014<br>2015<br>2016<br>2017 | R > U | ns                | ns                      |
